# Supplementary material for: Bacterial Consortium for Improved Maize (Zea mays L.) Production
Source: MDPI journal article supplement (doi:10.3390/microorganisms7110519), 2019-11-01
Supplement: s1 [file s1]

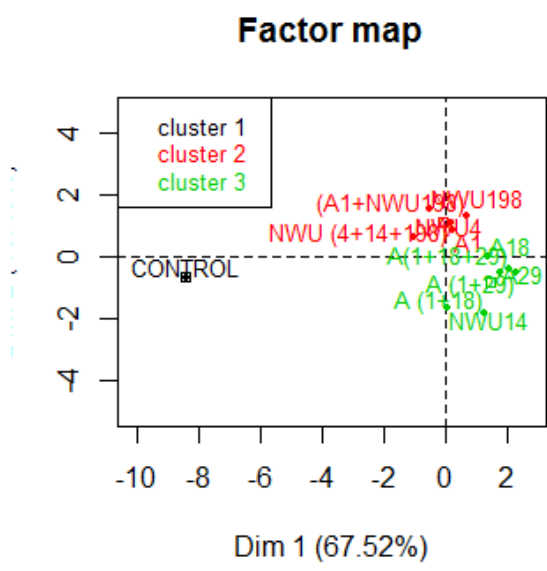

**Figure S1.** Factor map showing the clustering of the treatments into 3 groups.
